# Supplementary material for: The Relationships between Adolescents’ Obesity and the Built Environment: Are They City Dependent?
Source: PubMed Central journal article supplement (PMC6539234; doi:10.3390/ijerph16091579), 2019-05-06
Supplement: ijerph-16-01579-s001.pdf [file ijerph-16-01579-s001.pdf]

### **Supplement 1. Survey's response rate description**

| <b>Classification</b>                                                 | <b>n</b>    |                      |
|-----------------------------------------------------------------------|-------------|----------------------|
| 1. Completed interview                                                | <b>904</b>  |                      |
| 2. Partial interview                                                  | <b>20</b>   |                      |
| 3. Screening 1: no child between 15-18                                | <b>67</b>   |                      |
| 4. Screening 2: Address is not included in the study                  | <b>12</b>   |                      |
| 5. Screening 3: child does not live at household full time            | <b>96</b>   |                      |
| 6. Screening 4: child has a physical disability                       | <b>61</b>   |                      |
| 7. Screening 5: parent's refusal                                      | <b>288</b>  |                      |
| 8. Child could not be contacted                                       | <b>341</b>  |                      |
| 9. Child refusal                                                      | <b>243</b>  |                      |
| 10. Communication ceased (after multiple rejections)                  | <b>44</b>   |                      |
| 11. Respondents' difficulties answering questions (language barriers) | <b>30</b>   |                      |
| 12. No cooperation by the respondent                                  | <b>491</b>  |                      |
| 13. Rejects (were still in process at the end of survey)              | <b>439</b>  |                      |
| 14. Other cases where it was not possible to conduct the interview    | <b>21</b>   |                      |
| Total numbers attempted                                               | <b>3057</b> |                      |
|                                                                       | <b>n</b>    | <b>Response rate</b> |
| Total refusals                                                        | 1383        | <b>45.2%</b>         |
| General total                                                         | 904         | <b>29.5%</b>         |
